1  
2  
3  
4  
5  
6  
7  
8  
9  
10  
11  
12  
13  
14  
15  
16  
17  
18

**Mutations on RBD of SARS-CoV-2 Omicron variant result in stronger binding to  
human ACE2 receptor**

Cecylia S. Lupala<sup>a</sup>, Yongjin Ye<sup>a</sup>, Hong Chen<sup>b</sup>, Xiao-Dong Su<sup>b,\*</sup>  
Haiguang Liu<sup>a,c,\*</sup>,

<sup>a</sup> Complex Systems Division, Beijing Computational Science Research Center, Haidian,  
Beijing 100193, People's Republic of China

<sup>b</sup> School of Life Sciences, State Key Laboratory of Protein and Plant Gene Research and  
Biomedical Pioneering Innovation Center (BIOPIC), Peking University, Beijing 100871,  
People's Republic of China

<sup>c</sup> Physics Department, Beijing Normal University, Haidian, Beijing 100875, People's  
Republic of China

\*Corresponding authors: Xiao-Dong Su, [xdsu@pku.edu.cn](mailto:xdsu@pku.edu.cn) Or Haiguang Liu,  
[hgliu@csrc.ac.cn](mailto:hgliu@csrc.ac.cn)

19

## 20 **Abstract**

21 The COVID-19 pandemic caused by the SARS-CoV-2 virus has led to more than 270  
22 million infections and 5.3 million of deaths worldwide. Several major variants of SARS-  
23 CoV-2 have emerged and posed challenges in controlling the pandemic. The recently  
24 occurred Omicron variant raised serious concerns about reducing the efficacy of vaccines  
25 and neutralization antibodies due to its vast mutations. We have modelled the complex  
26 structure of the human ACE2 protein and the receptor binding domain (RBD) of Omicron  
27 Spike protein (S-protein), and conducted atomistic molecular dynamics simulations to  
28 study the binding interactions. The analysis shows that the Omicron RBD binds more  
29 strongly to the human ACE2 protein than the original strain. The mutations at the ACE2-  
30 RBD interface enhance the tight binding by increasing hydrogen bonding interaction and  
31 enlarging buried solvent accessible surface area.

32

33 **Keywords:** SARS-CoV-2, Omicron mutant, ACE2, Receptor binding domain, Molecular  
34 dynamics simulation

35

36

## 37 **Introduction**

38 The COVID-19 pandemic caused by the SARS-CoV-2 is affecting global health and  
39 economy seriously[1]. According to JHU CSSE COVID-19 Data[2], there are 270 million  
40 infections and over 5.3 million fatalities as of December 13, 2021. Several vaccines have  
41 been developed and applied to prevent the spreading of SARS-CoV-2 viruses[3], however,  
42 these efforts are challenged by emerged virus variants due to mutations [4–7]. Among  
43 major variants, several strains were called out to be ‘variant of concerns (VOC)’ by the  
44 world health organization (WHO). On November 26, 2021, the WHO named a new variant  
45 (B.1.1.529) to be Omicron, designated to be a VOC [8]. The Omicron variant has  
46 accumulated a vast number of mutations, particularly in spike protein that is responsible  
47 for the initiation of infection through cell entry. There are 15 mutations on the receptor  
48 binding domain (RBD) of the spike protein, which has over 30 mutations in total (see  
49 Figure 1) [8,9]. Such a large number of accumulated mutations is unprecedented. Because the  
50 spike protein is not only the receptor ACE2 (Angiotensin converting enzyme 2) binding  
51 partner [10,11], but also the major antigenicity site, thus the target of many antibodies or  
52 drugs, it is crucial to investigate the impacts to the efficacy of neutralizing antibodies,  
53 under the concerns of immune escapes. Furthermore, about 10 mutations occur at the RBD  
54 binding interface to the ACE2 receptor protein. This level of mutation also raised a serious  
55 question on how the RBD of Omicron variant binds to the ACE2. Will the binding become  
56 stronger or weaker, and whether there is a need for an alternative receptor to facilitate the  
57 infection of human cells?

58

59 Computational modeling and dynamics simulations have been applied to investigate the  
60 interactions between the SARS-CoV-2 RBD and the ACE2 receptor [12,13]. Before the  
61 structures of RBD-ACE2 complex were resolved experimentally, homology modeling and

62 simulations have successfully predicted the model and quantified the interactions [13,14].  
 63 Computer simulations were also used to study the interactions between RBD and ACE2  
 64 from other mammals, and the results provide hints on molecular mechanism for SARS-  
 65 CoV-2 infection to other animals [15,16]. Here, we followed a similar approach,  
 66 constructed the structure of human ACE2 and the RBD of Omicron variant (hereafter  
 67 denoted as ACE2-RBD<sup>O</sup>, where the superscript indicates Omicron). Then the complex  
 68 structure was subjected to atomistic molecular dynamics simulations to refine the model  
 69 and to probe the dynamical interactions between ACE2 and RBD. After comparing to the  
 70 wild type ACE2-RBD complex system, we found that the RBD<sup>O</sup> exhibits stronger binding  
 71 to human ACE2, suggesting that the Omicron variant infects cells via the same mechanism  
 72 and the infectivity might be enhanced due to the stronger binding interactions.

73

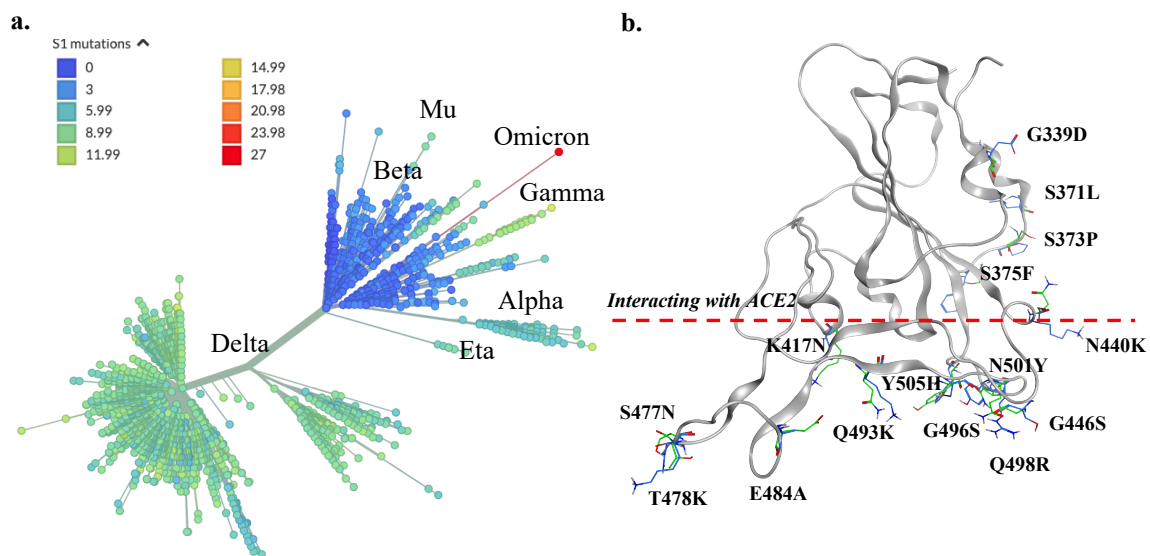

74  
 75 **Figure 1. Mutations and the diversity of SARS-CoV-2.** (a) The phylogenetic tree of  
 76 SARS-CoV-2. Major variants are labelled on the graph, and the color of clans is according  
 77 to the number of spike protein mutations. The tree is generated at <https://nextstrain.org>. (b)  
 78 Mutation sites of the receptor binding domain. The residues below the red line are at or  
 79 near the ACE2 binding interface.

80

81

## 82 **Results**

83 **The structures of Omicron RBD and ACE2-RBD complex are stable.** The averaged  
84 backbone root-mean-square-deviation (RMSD) of the RBD is less than 1.4 Å compared to  
85 the starting model for both the wild type and Omicron systems (Figure 2a). For the wild  
86 type RBD, the structure ensembles from two independent simulations (each 500 ns)  
87 deviated from the crystal structure of RBD by 1.2 Å on average; interestingly, the RBD<sup>O</sup>  
88 has averaged RMSD values of 1.4 Å, indicating that the mutations only slightly alter the  
89 structure of RBD<sup>O</sup> from the wild type RBD. Similarly, the ACE2-RBD complexes are  
90 stable through simulations, reflecting on the RMSD with respect to starting complex  
91 structures (Figure 2b). The RMSD for the wild type ACE2-RBD complex is averaged to  
92 3.0 Å and 2.5 Å for the structures sampled from the two trajectories; while the values are  
93 2.2 Å and 2.6 Å for the two simulation trajectories of ACE2-RBD<sup>O</sup>. Therefore, we predict  
94 that the mutations in Omicron variant do not significantly reduce the RBD stability, instead,  
95 the ACE2-RBD<sup>O</sup> complex is even slightly more stable than the wild type, according to the  
96 RMSD analysis. The residue fluctuations were analyzed by calculating the root-mean-  
97 square-fluctuations (RMSF) of the RBD (Figure 2c). According to the average values of  
98 RMSF, the RBD<sup>O</sup> is more rigid than its wild type (1.5 Å vs. 2.1 Å). The reduction of the  
99 RMSF is more pronounced at the interfacing residues of RBD, also known as the receptor  
100 binding motif (RBD, residues 434-508) [17]. We also closely examined the fluctuations of  
101 mutated residues (Figure 2c, right panel) and found that the 15 mutated residues in the  
102 Omicron variant consistently exhibit smaller fluctuations, compared to their wild type  
103 counterparts. It is plausible that the binding of ACE2 stabilize these residues, which in turn  
104 enhance the stability of the ACE2-RBD<sup>O</sup> complex. Detailed quantifications on interactions  
105 between ACE2 and RBD are elaborated in the following sections.

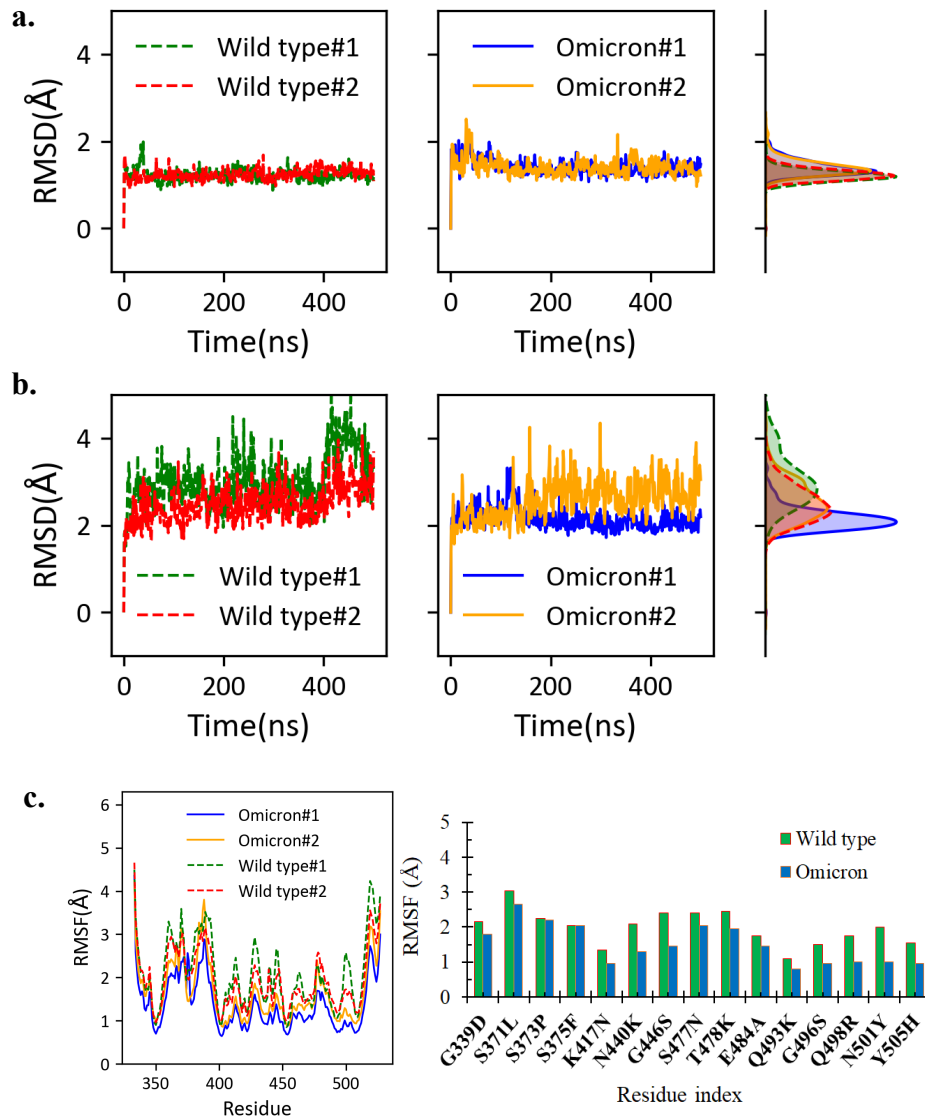

106

107 **Figure 2. Stability of the RBD and ACE2-RBD complex structures.** (a) The RMSD of

108 RBD with respect to the starting structure. The histogram of each RMSD time trace is

109 drawn on the right. (b) The RMSD of the whole complex with respect to the starting

110 complex structure, with the histograms shown on the right. (c) The RBD residue

111 fluctuations. The residue fluctuations for the mutation sites are shown on the right panel.

112

113 **The interactions between ACE2 and RBD are enhanced in Omicron variant.** We

114 extracted the hydrogen bonds formed directly between ACE2 and RBD<sup>O</sup>, and further

115 compared the data to the wild type system (Figure 3). On average, there are  $6.5 \pm 2.2$

116 hydrogen bonds formed between ACE2 and RBD<sup>O</sup>, about 10% more than  $5.9 \pm 2.4$   
117 hydrogen bonds observed in the wild type system. A closer examination on the specific  
118 hydrogen bonds reveals that the Q493K and N501Y play important roles in forming new  
119 hydrogen bonds (Table 1). It is worthwhile to note that the hydrogen bonds are very  
120 dynamical, and the total number of hydrogen bonds at any instant time fluctuates  
121 significantly. Therefore, in the table we only listed seven hydrogen bonds that are  
122 frequently observed during simulations, with the occupancy close to 20% or above. As  
123 shown in Table 1, the only hydrogen bond with occupancy below 20% is between ACE2  
124 S19 and RBD A475 (occupancy = 18.73%). In the case of ACE2-RBD<sup>O</sup>, the next  
125 frequently observed hydrogen bond is between K31 of ACE2 and W456 of RBD<sup>O</sup> with an  
126 occupancy of 16.25% (not listed in Table 1). As shown in Table 1, there are five common  
127 stable hydrogen bonds observed in both the wild type and Omicron variant systems. The  
128 mutations resulted in the loss of two hydrogen bonds: (1) the K417N mutation caused the  
129 loss of hydrogen bonding with ACE2 residue D30, and (2) the Y505H mutation  
130 significantly reduced its bonding to E37 of ACE2. The Q493K mutation not only maintains  
131 the hydrogen bond between Q493 and E35 of ACE2 in the wild type complex, but also  
132 adds the possibility of forming a new stable hydrogen bond between K493 and the D38 of  
133 ACE2. The hydrogen bond between Y501 of RBD<sup>O</sup> and the Y41 of the ACE2 is also a new  
134 hydrogen bond frequently observed in simulations. The hydrogen bond between the S19 of  
135 ACE2 and the A475 of RBD<sup>O</sup> is stronger than that in the wild type system, although  
136 neither residues were mutated in the Omicron variant. It is possibly influenced by the local  
137 changes due to the S477N and T478K mutations. By comparing the occupancies, we  
138 conclude that the hydrogen bonds between ACE2 and RBD<sup>O</sup> are more stable through the  
139 simulations, and therefore resulting more hydrogen bonds on average.

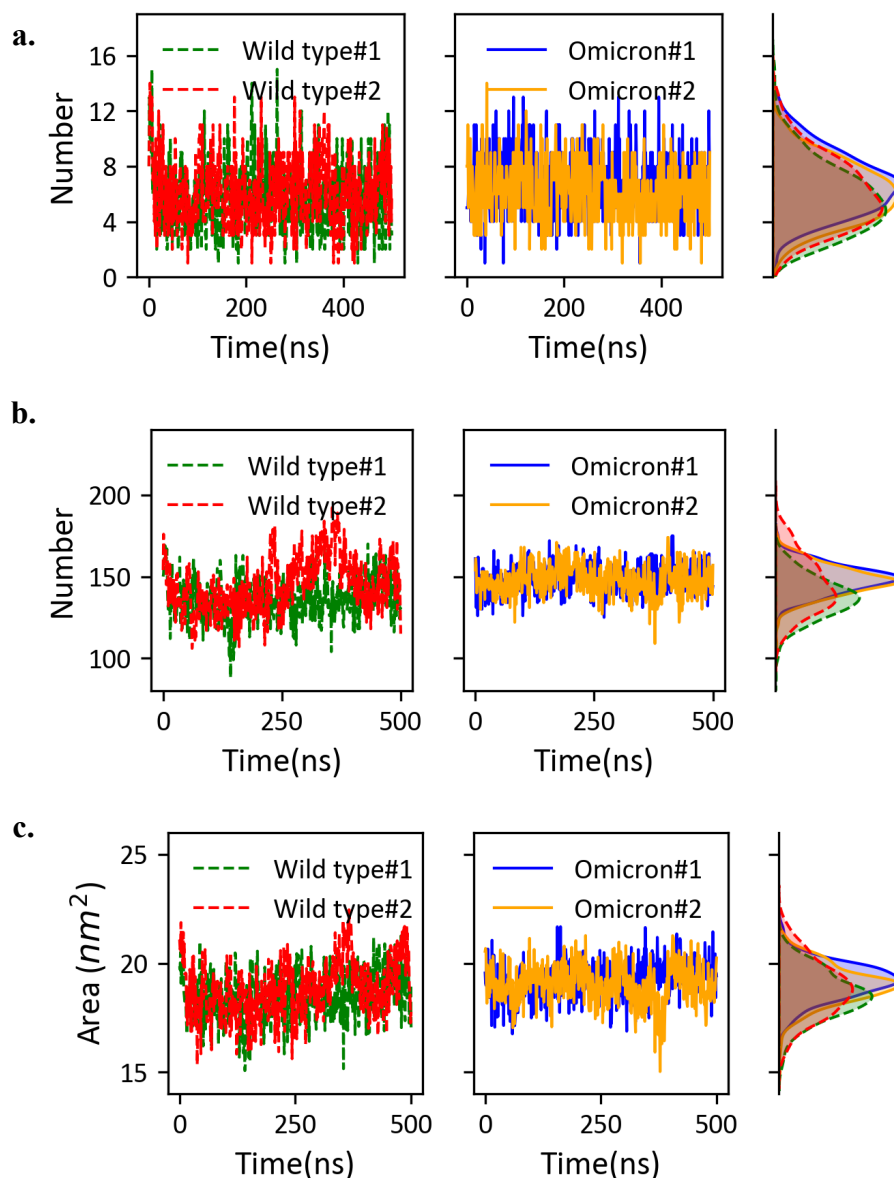

140

141 **Figure 3. Quantitative analysis of the ACE2-RBD interactions.** (a) Hydrogen bonds  
 142 between ACE2 and RBD/RBD<sup>o</sup>. The time traces of hydrogen bond numbers observed  
 143 during the simulations are shown on the left and middle columns. The histograms are  
 144 shown on the right column to compare the statistics between the wild type system and the  
 145 Omicron variant system. (b) The number of residue contacts between ACE2 and RBD. (c)  
 146 The buried surface area due to ACE2-RBD binding. Similar to (a), the histograms are  
 147 shown to facilitate the comparison in (b, c).

148



149 **Table 1. Hydrogen bonds between the RBD and the ACE2.**

| Wild type ACE2-RBD |           |           | Omicron ACE2-RBD |                  |           |
|--------------------|-----------|-----------|------------------|------------------|-----------|
| ACE2               | RBD       | Occupancy | ACE2             | RBD <sup>o</sup> | Occupancy |
| K353-Main          | G502-Main | 57.97%    | E35-Side         | K493-Side<br>*   | 75.67%    |
| Y83-Side           | N487-Side | 50.60%    | D355-Side        | T500-Side        | 60.52%    |
| E35-Side           | Q493-Side | 38.84%    | K353-Main        | G502-Main        | 57.03%    |
| D30-Side           | K417-Side | 34.36%    | D38-Side         | K493-Side<br>*   | 52.34%    |
| D355-Side          | T500-Side | 25.60%    | Y83-Side         | N487-Side        | 52.04%    |
| E37-Side           | Y505-Side | 21.71%    | S19-Side         | A475-Main        | 36.59%    |
| S19-Side           | A475-Main | 18.73%    | Y41-Side         | Y501-Side<br>*   | 35.00%    |

150 \* The residues were mutated from the wild type RBD  
 151 The entries shaded in blue color are either not lost or with low occupancy in the Omicron variant  
 152 system; the entries with yellow shading are the new hydrogen bonds observed in the Omicron  
 153 variant; the other entries are the common hydrogen bonds in both wild type and Omicron systems.  
 154

155 We computed the number of van der Waals contacts between the ACE2 and RBD, as well  
 156 as the buried surface area, to further assess the interactions between ACE2 and RBD. For  
 157 the wild type system, the two simulations yield  $137 \pm 12$  contacts on average, while the  
 158 ACE2-RBD<sup>o</sup> has  $148 \pm 9$  contacts on average (Figure 3b). The statistics on the buried  
 159 surface areas are consistent with the level of contacts. The Omicron variant resulted an  
 160 increase of buried surface area from  $18.5 \text{ nm}^2$  to  $19.1 \text{ nm}^2$  (Figure 3c).  
 161

162 **The representative structures are highly similar.** The representative structures were  
 163 selected from the most populated clusters for the ACE2-RBD complexes. The largest  
 164 cluster accounts for about 19.8% of the simulated structures for the wild type complex, and  
 165 the largest cluster for the Omicron complex accounts for 38.4% of the sampled structures.  
 166 The RBD structures are similar in the representative models, both within  $1.4 \text{ \AA}$  backbone  
 167 RMSD from the crystal structure (see Figure 4). In particular, the RBM regions are aligned  
 168 very nicely (with backbone RMSD  $< 0.5 \text{ \AA}$ ) for these structures, in accordance with the  
 169 tight binding to ACE2. We computed the electrostatic potentials by solving the Poisson-  
 170 Boltzmann equation for the RBM region in three structures (Figure 4b): the crystal

171 structure and representative structure of the wild type RBD, as well as the representative  
 172 structure of the RBD<sup>O</sup>. For the wild type RBD, positive and negative potential patches are  
 173 dispersedly located at the binding interface. Strikingly, the same interface has larger  
 174 patches with positive potentials in the RBD<sup>O</sup>. For instance, the region around G446S-  
 175 Q493K-G496S-Q498R-N501Y-Y505H mutation sites exhibits stronger positive  
 176 electrostatic potentials, improving its complementary to the charge surface of ACE2  
 177 protein (Figure 4c). In the corresponding region, the key residues from ACE2 are  
 178 composed of D38-Y41-Q42-D355-S446, forming a negatively charged patch. We  
 179 computed the binding energies for the representative models. In this case, we obtained one  
 180 representative structure from each simulation trajectory using the same clustering  
 181 algorithm, then we obtained two representative structures for the wild type ACE-RBD, and  
 182 two for the Omicron variant system. The binding energies for the two wild type ACE2-  
 183 RBD structures are -104.17 kcal/mol and -97.73 kcal/mol. The binding energies for ACE2-  
 184 RBD<sup>O</sup> structures are even lower (-112.25 kcal/mol and -107.04 kcal/mol), indicating  
 185 stronger binding between ACE2 and RBD<sup>O</sup>.

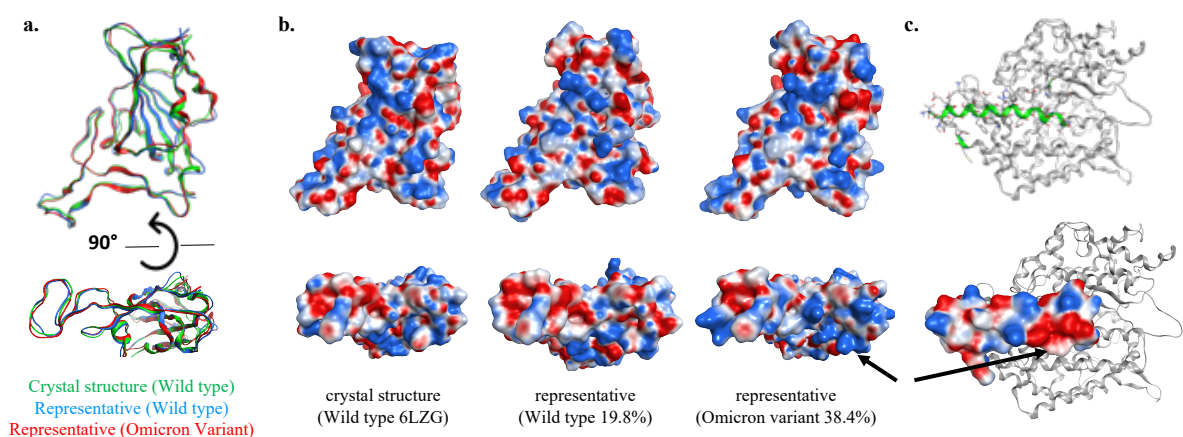

187 **Figure 4. Representative structures and the electrostatic potential surfaces.** (a) The  
 188 representative structures of wild type RBD (blue) and RBD<sup>O</sup> (red) are superposed to the  
 189 crystal structure (green). The bottom panel shows the structure alignment for the ACE2  
 190 binding interface of RBD. (b) The electrostatic potentials on the RBD/RBD<sup>O</sup> surface (-5  
 191  $k_B T/e$  to +5  $k_B T/e$ , for colors from red to blue). (c) The RBD binding interface of ACE2

192 and its electrostatic potentials (calculated from the crystal structure of ACE2). The black  
193 arrows point to the largest positive (on RBD<sup>o</sup>) and negative potential patches (on ACE2).  
194

### 195 **Detailed structure features at the ACE2-RBD interface**

196 The interactions at the interface of ACE2-RBD complex for the wild type have been  
197 previous reported in the perspectives of both static crystal structures [18,19] and dynamical  
198 conformations [13]. Generally, ACE2 residues 19-42 of the N-terminal helix, 82-83 near  
199 the  $\eta$ 1, N330 at helix-13 and 352-357 at the  $\beta$ -hairpin-4,5 are in close contacts with RBD.  
200 For the RBD, crystal structures show that residues K417, G446, Y449, Y453, L455, F456,  
201 A475, F486, N487, Y489, Q493, Y495, G496, Q498, T500, N501, G502 and Y505 form  
202 direct contacts with human ACE2, while simulations have revealed additional residues  
203 Q474, G476, S477, T478, E484 and G485 at the loop (L<sub>67</sub>) of RBD to enhance the  
204 interactions [13]. Out of the 15 RBD mutations found in the Omicron variant, 10 residues  
205 (K417N, N440K, G446S, S477N, T478K, E484A, Q493K, G496S, Q498R, N501Y and  
206 Y505H) are located at ACE2-RBD interface, consequently changing the electrostatics  
207 surface charges at the interface and may have additional effects on the binding of  
208 antibodies and drugs targeting the interface due to the bulkier size of the mutant sidechains  
209 such as in T478K. This also applies for the mutant residue N440K at a loop near the  
210 binding interface with ACE2 (see Figure 5).

211

212 As a result of these mutations, wild type RBD-ACE2 interactions (Figure 5a) such as salt  
213 bridge E484-K31 are lost, K417-D30 are weakened in the Omicron variant due to  
214 shortened side chains, while hydrogen bonds Q493-E35, Q498-K353, Y505-E37 are  
215 enhanced by the Omicron substitutions, repositioning and forming new interactions, such  
216 as the favorable interactions K493-D38, R498-Y41, R498-Q42 H505-K353 and N377-  
217 Q24. Mutations also introduce additional  $\pi$ - $\pi$  stacking interaction Y501-Y41. The key

218 interactions observed in wild type ACE2-RBD are maintained in the Omicron variant  
219 (Figure 5b). These preserved interaction includes the following pairs: Y449-D38, Y453-  
220 H34 A475-S19, N487-Y83, T500-N330 and T500-D355.

221 Although the structures are highly similar in terms of backbone traces, there are notable  
222 conformational differences between the initial structure of the complex and the  
223 representative structure near the ACE2-RBD interface (Figure 5c). The N-terminal helices  
224 exhibit slightly kinked conformations, suggesting a larger separation from Omicron RBD  
225 by appearance. Nonetheless, careful analysis shows that the major binding interactions are  
226 well maintained through simulations, manifested as the highly consistent positions of key  
227 residues of ACE2 (highlighted in Figure 5c). The changes of RBD residue side chain  
228 positions suggest that MD simulations are useful in refining the quality of predicted  
229 complex structures. The side chains of F375 and K400 both point towards the ACE2  
230 receptor in the representative structure, providing auxiliary supports to binding interactions  
231 (Figure 5c).

232

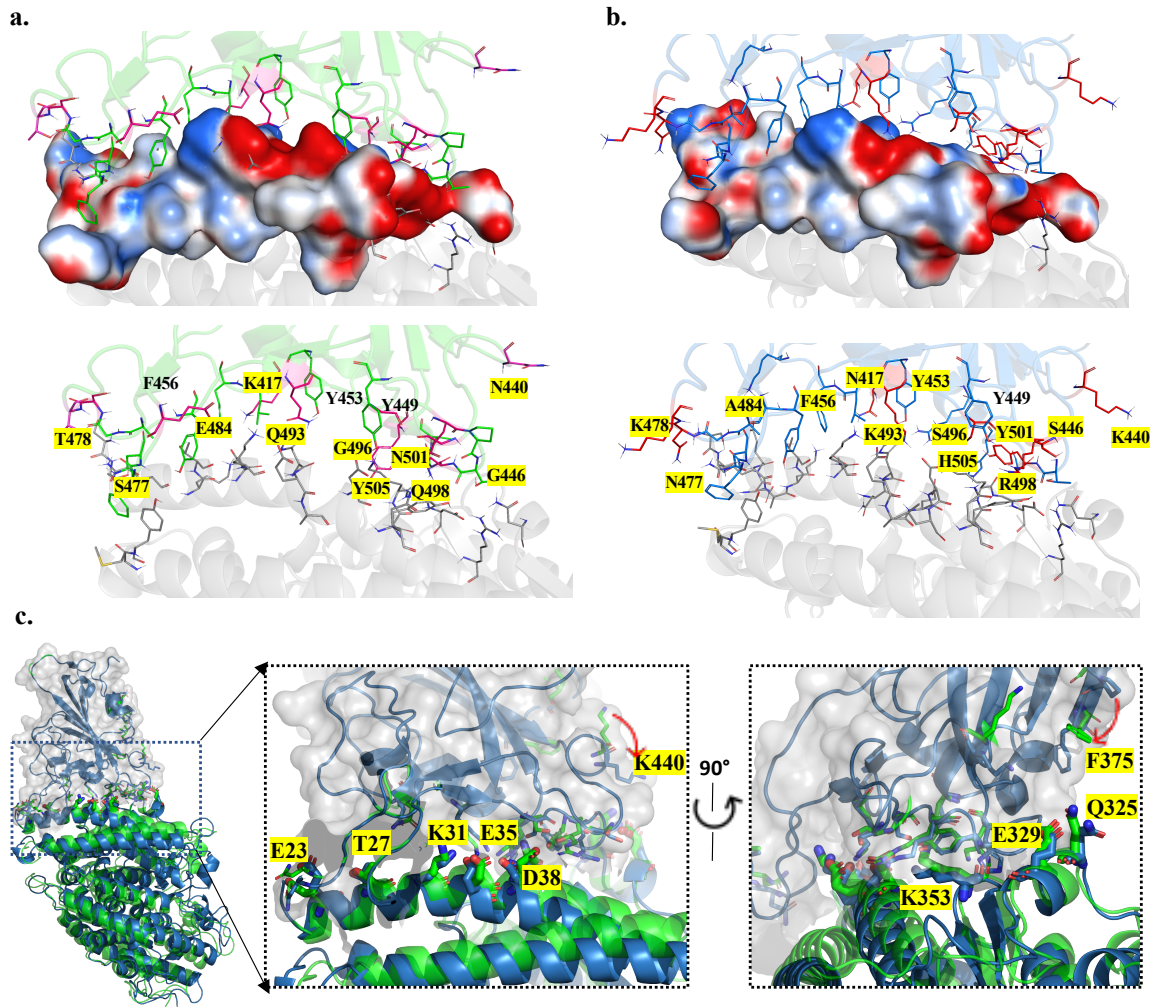

233  
234

235 **Figure 5. Detailed structures at the ACE2-RBD binding interface.** (a) The interface of the  
 236 wild type ACE2-RBD complex, the amino acids at mutation sites are shown with stick  
 237 representations. The upper panels show the side chain positions of RBD on the surface of  
 238 ACE2, where the surface is colored according to electrostatic potentials ( $-5 k_B T/e$  to  $+5 k_B T/e$ ,  
 239 for colors from red to blue); lower panel shows the side chains of both ACE2 and RBD. (b)  
 240 The interactions between ACE2-RBD of the Omicron variant. The figure labeling and  
 241 coloring scheme are the same as in (a). The amino acids at mutation sites are highlighted with  
 242 yellow color. (c) The conformation and the positions of ACE2 residues that are in close  
 243 contact with RBD. The predicted complex model is shown in green color, and the  
 244 representative model is in blue color. The RBD domain is enclosed by the solvent accessible  
 245 surface colored in gray. The right panels show enlarged views of the interface in two  
 246 orientations. The key residue side chains are shown in thicker sticks. Red arrows indicate the  
 247 major movements of RBD residue side chains.  
 248

249  
250

251

## 252 **Discussions and Conclusion**

253 The large number of mutations observed in the spike protein of SARS-CoV-2 raised  
254 serious concerns about the new variant Omicron. Using computational modeling and  
255 simulations, we carried out quantitative analysis on the stability of ACE2-RBD complex  
256 for the Omicron variant, and compared to that of the wild type system. The interactions  
257 were assessed using several quantities, including hydrogen bonds, van der Waals contacts,  
258 buried surface areas, and the binding free energies. The dynamics simulation results and  
259 the quantitative comparison show that the binding interactions between ACE2 and RBD  
260 are slightly stronger for the Omicron variant than for the wild type. This information  
261 provides molecular basis for enhanced infectivity of the Omicron variant.

262

263 Most of effective neutralization antibodies are found to bind to RBD epitopes, many of them  
264 compete with ACE2 interactions, previous study has found that many of the neutralization  
265 antibodies are still effective to a large extent against the SARS CoV2 variants before  
266 Omicron variant [20,21]. However, the latest results have shown that 85% of previously  
267 characterized neutralization antibodies lost their efficacy against the new variant Omicron  
268 [22]. Therefore, the analyses of RBD-ACE2 interaction are not only important for the  
269 understanding of the outcome of the new virus variant, but also crucial for predicting and  
270 design for therapeutic antibody efficacy, particularly for further development of new  
271 generations of therapeutic antibodies that can overcome immune escaping mutants.

272

273

## 274 **Methods**

### 275 **Molecular Dynamics Simulation and Analysis**

276 The mutation information of Omicron is retrieved from the US CDC website [9]. We  
277 included 15 mutations occurred in the RDB (see Figure 1). The mutations were  
278 implemented based on the wild type ACE2-RBD complex structure using the Charmm-  
279 GUI webserver [23]. The protonation state was determined under PH 7.0 solvent  
280 environment.

281 The wild type ACE2-RBD and its Omicron variant were prepared using the CHARMM36  
282 force fields, following the procedure of the CHARMM-GUI webserver. Each system was  
283 solvated in 150 mM sodium chloride solvent with TIP3P water models. Steepest descent  
284 algorithm was applied to minimize the system energy, then each system was equilibrated to  
285 310.15 K (37 °C) within 125 ps. The temperature was maintained by Nose-Hoover scheme  
286 with 1.0 ps coupling constant in the NVT ensemble (constant volume and temperature).

287 During the equilibration stage, harmonic restraint forces were applied to the molecules (400  
288  $\text{kJ mol}^{-1} \text{nm}^{-2}$  on backbone and  $40 \text{ kJ mol}^{-1} \text{nm}^{-2}$  on the side chain atoms) [24,25].

289 Subsequently, the harmonic restraints were removed and the NPT ensembles (constant  
290 pressure and temperature) were simulated at one atmosphere pressure ( $10^5 \text{ Pa}$ ) and 310.15 K.  
291 The pressure was maintained by isotropic Parrinello-Rahman barostat [26], with a  
292 compressibility of  $4.5 \times 10^{-5} \text{ bar}^{-1}$  and a coupling time constant of 5.0 ps. The wild type and  
293 Omicron variant ACE2-RBD systems were both simulated for 2 x 500 ns using the  
294 GROMACS 5.1.2 package [27]. In all simulations, a time step of 2.0 fs was used and the  
295 PME (particle mesh Ewald) [28] was applied for electrostatic interactions beyond 12.0 Å.  
296 The van der Waals interaction cutoff was set to 12.0 Å. Hydrogen atoms were constrained  
297 using the LINCS algorithm [29].

298

299 Analyses were carried out with tools in GROMACS (rmsd, rmsf, mindist, sasa) to examine  
300 the system stability. The buried surface area is computed as

301 
$$\Delta A = A_{ACE2} + A_{RBD} - A_{ACE2-RBD} \quad (1)$$

302 Where  $A_{ACE2}$ ,  $A_{RBD}$ , and  $A_{ACE2-RBD}$  are the solvent accessible surface area computed using  
303 gmx sasa function. The mindist command was used to compute the residue distances, the  
304 residue pairs with distance below 4.0 Å were considered as contacting residues.

305 VMD was used to analyze hydrogen bonding interactions [30], with the following criteria: D-  
306 A distance cutoff=3.9 Å and D-H-A angle cutoff=20 degrees, where D,A,H are Donor atom,  
307 Acceptor atom, and the Hydrogen atom linked to the Donor atom. Pymol was used for  
308 molecular binding interface, water distributions, visualization, and rendering model images  
309 [30]. The adaptive Poisson-Boltzmann equation solver (APBS) was used to compute the  
310 electrostatic potentials [31].

311

312 The binding energy was calculated using Prime 3.0 MM-GBSA module of the Schrodinger  
313 24 package [32–34]. In each ACE2-RBD complex, the ACE2 was treated as the receptor and  
314 RBD was considered as the ligand. Prime MM-GBSA uses OPLS-AA force field and VSGB  
315 2.0 implicit solvation model to estimate the binding energy of the receptor-ligand complex.  
316 The binding energy is calculated as:

317 
$$\Delta G (\text{bind}) = E_{ACE2-RBD} - (E_{ACE2} + E_{RBD}) \quad (2)$$

318

### 319 **Acknowledgement**

320 This work was supported by the National Key Research and Development Projects of the  
321 Ministry of Science and Technology of China (2021YFC2301300) to X.-D.S, and the  
322 National Natural Science Foundation of China (grant numbers: U1930402, 31971136) to  
323 H.L. The computational work is supported by a Tianhe-2JK computing time award at  
324 Beijing Computational Science Research Center (CSRC).

325

### 326 **Competing interests**

327 The authors declare no competing interests.

328



329 **Reference:**

- 330 [1] I. Ishigami, N.A. Zatsepin, M. Hikita, C.E. Conrad, G. Nelson, J.D. Coe, S. Basu, T.D.  
331 Grant, M.H. Seaberg, R.G. Sierra, M.S. Hunter, P. Fromme, R. Fromme, S.R. Yeh,  
332 D.L. Rousseau, Crystal structure of CO-bound cytochrome c oxidase determined by  
333 serial femtosecond X-ray crystallography at room temperature, *Proc. Natl. Acad. Sci.*  
334 *U. S. A.* 114 (2017) 8011–8016. <https://doi.org/10.1073/pnas.1705628114>.
- 335 [2] Johns Hopkins Coronavirus Resource Center, (n.d.).  
336 <https://coronavirus.jhu.edu/vaccines/vaccines-faq> (accessed December 13, 2021).
- 337 [3] E. Mathieu, H. Ritchie, E. Ortiz-Ospina, M. Roser, J. Hasell, C. Appel, C. Giattino, L.  
338 Rodés-Guirao, A global database of COVID-19 vaccinations, *Nat. Hum. Behav.* 5  
339 (2021) 947–953. <https://doi.org/10.1038/s41562-021-01122-8>.
- 340 [4] J.S. Tregoning, K.E. Flight, S.L. Higham, Z. Wang, B.F. Pierce, Progress of the  
341 COVID-19 vaccine effort: viruses, vaccines and variants versus efficacy, effectiveness  
342 and escape, *Nat. Rev. Immunol.* 2021 2110. 21 (2021) 626–636.  
343 <https://doi.org/10.1038/s41577-021-00592-1>.
- 344 [5] P.R. Krause, T.R. Fleming, R. Peto, I.M. Longini, J.P. Figueroa, J.A.C. Sterne, A.  
345 Cravioto, H. Rees, J.P.T. Higgins, I. Boutron, H. Pan, M.F. Gruber, N. Arora, F. Kazi,  
346 R. Gaspar, S. Swaminathan, M.J. Ryan, A.M. Henao-Restrepo, Considerations in  
347 boosting COVID-19 vaccine immune responses, *Lancet.* 398 (2021) 1377–1380.  
348 [https://doi.org/10.1016/S0140-6736\(21\)02046-8/ATTACHMENT/99B4689E-FA37-476A-B30E-8D1E3B4E33BC/MMC1.PDF](https://doi.org/10.1016/S0140-6736(21)02046-8/ATTACHMENT/99B4689E-FA37-476A-B30E-8D1E3B4E33BC/MMC1.PDF).
- 350 [6] A.P. Vashi, O.C. Coiado, The future of COVID-19: A vaccine review, *J. Infect. Public*  
351 *Health.* 14 (2021) 1461–1465. <https://doi.org/10.1016/J.JIPH.2021.08.011>.
- 352 [7] L. Wang, T. Zhou, Y. Zhang, E.S. Yang, C.A. Schramm, W. Shi, A. Pegu, O.K.  
353 Oloniniyi, A.R. Henry, S. Darko, S.R. Narpala, C. Hatcher, D.R. Martinez, Y.  
354 Tsybovsky, E. Phung, O.M. Abiona, A. Antia, E.M. Cale, L.A. Chang, M. Choe, K.S.  
355 Corbett, R.L. Davis, A.T. DiPiazza, I.J. Gordon, S.H. Hait, T. Hermanus, P. Kgagudi,  
356 F. Laboune, K. Leung, T. Liu, R.D. Mason, A.F. Nazzari, L. Novik, S. O’Connell, S.  
357 O’Dell, A.S. Olia, S.D. Schmidt, T. Stephens, C.D. Stringham, C.A. Talana, I.T. Teng,  
358 D.A. Wagner, A.T. Widge, B. Zhang, M. Roederer, J.E. Ledgerwood, T.J. Ruckwardt,  
359 M.R. Gaudinski, P.L. Moore, N.A. Doria-Rose, R.S. Baric, B.S. Graham, A.B.  
360 McDermott, D.C. Douek, P.D. Kwong, J.R. Mascola, N.J. Sullivan, J. Misasi,  
361 Ultrapotent antibodies against diverse and highly transmissible SARS-CoV-2 variants,  
362 *Science.* 373 (2021). <https://doi.org/10.1126/science.abh1766>.
- 363 [8] Classification of Omicron (B.1.1.529): SARS-CoV-2 Variant of Concern, (n.d.).  
364 [https://www.who.int/news/item/26-11-2021-classification-of-omicron-\(b.1.1.529\)-sars-cov-2-variant-of-concern](https://www.who.int/news/item/26-11-2021-classification-of-omicron-(b.1.1.529)-sars-cov-2-variant-of-concern) (accessed December 9, 2021).
- 365 [9] Science Brief: Omicron (B.1.1.529) Variant | CDC, (n.d.).  
366 <https://www.cdc.gov/coronavirus/2019-ncov/science/science-briefs/scientific-brief-omicron-variant.html> (accessed December 9, 2021).
- 367 [10] J. Shang, G. Ye, K. Shi, Y. Wan, C. Luo, H. Aihara, Q. Geng, A. Auerbach, F. Li,  
368 Structural basis of receptor recognition by SARS-CoV-2, *Nature.* 581 (2020) 221–224.  
369 <https://doi.org/10.1038/s41586-020-2179-y>.
- 370 [11] R. Yan, Y. Zhang, Y. Li, L. Xia, Y. Guo, Q. Zhou, Structural basis for the recognition  
371 of SARS-CoV-2 by full-length human ACE2, *Science.* 367 (2020) 1444–1448.  
372 <https://doi.org/10.1126/science.abb2762>.
- 373 [12] Y. Wang, M. Liu, J. Gao, Enhanced receptor binding of SARS-CoV-2 through  
374 networks of hydrogen-bonding and hydrophobic interactions, *Proc. Natl. Acad. Sci.*  
375 117 (2020) 13967–13974. <https://doi.org/10.1073/pnas.2008209117>.
- 376 [13] C.S. Lupala, X. Li, J. Lei, H. Chen, J. Qi, H. Liu, X.-D. Su, Computational simulations

- 379 reveal the binding dynamics between human ACE2 and the receptor binding domain  
380 of SARS-CoV-2 spike protein, *Quant. Biol.* 9 (2021) 61. [https://doi.org/10.15302/J-](https://doi.org/10.15302/J-QB-020-0231)  
381 [QB-020-0231](https://doi.org/10.15302/J-QB-020-0231).
- [14] X. Xu, P. Chen, J. Wang, J. Feng, H. Zhou, X. Li, W. Zhong, P. Hao, Evolution of the  
382 novel coronavirus from the ongoing Wuhan outbreak and modeling of its spike protein  
383 for risk of human transmission, *Sci. China Life Sci.* 63 (2020) 457–460.  
384 <https://doi.org/10.1007/s11427-020-1637-5>.
- [15] J. Damas, G.M. Hughes, K.C. Keough, C.A. Painter, N.S. Persky, M. Corbo, M. Hiller,  
386 K.P. Koepfli, A.R. Pfenning, H. Zhao, D.P. Genereux, R. Swofford, K.S. Pollard, O.A.  
387 Ryder, M.T. Nweeia, K. Lindblad-Toh, E.C. Teeling, E.K. Karlsson, H.A. Lewin,  
388 Broad host range of SARS-CoV-2 predicted by comparative and structural analysis of  
389 ACE2 in vertebrates, *Proc. Natl. Acad. Sci. U. S. A.* 117 (2020) 22311–22322.  
390 <https://doi.org/10.1073/pnas.2010146117>.
- [16] C.S. Lupala, V. Kumar, X. Su, C. Wu, H. Liu, Computational insights into differential  
392 interaction of mammalian angiotensin-converting enzyme 2 with the SARS-CoV-2  
393 spike receptor binding domain, *Comput. Biol. Med.* (2021) 105017.  
394 <https://doi.org/10.1016/j.compbiomed.2021.105017>.
- [17] C. Yi, X. Sun, J. Ye, L. Ding, M. Liu, Z. Yang, X. Lu, Y. Zhang, L. Ma, W. Gu, A. Qu,  
396 J. Xu, Z. Shi, Z. Ling, B. Sun, Key residues of the receptor binding motif in the spike  
397 protein of SARS-CoV-2 that interact with ACE2 and neutralizing antibodies, *Cell. Mol.*  
398 *Immunol.* 17 (2020) 621–630. <https://doi.org/10.1038/s41423-020-0458-z>.
- [18] Q. Wang, Y. Zhang, L. Wu, S. Niu, C. Song, Z. Zhang, G. Lu, C. Qiao, Y. Hu, K.Y.  
400 Yuen, Q. Wang, H. Zhou, J. Yan, J. Qi, Structural and Functional Basis of SARS-  
401 CoV-2 Entry by Using Human ACE2, *Cell.* 181 (2020) 894-904.e9.  
402 <https://doi.org/10.1016/j.cell.2020.03.045>.
- [19] J. Lan, J. Ge, J. Yu, S. Shan, H. Zhou, S. Fan, Q. Zhang, X. Shi, Q. Wang, L. Zhang, X.  
404 Wang, Structure of the SARS-CoV-2 spike receptor-binding domain bound to the  
405 ACE2 receptor., *Nature.* (2020). <https://doi.org/10.1038/s41586-020-2180-5>.
- [20] S. Du, P. Liu, Z. Zhang, T. Xiao, A. Yasimayi, W. Huang, Y. Wang, Y. Cao, X.S. Xie,  
407 J. Xiao, Structures of SARS-CoV-2 B.1.351 neutralizing antibodies provide insights  
408 into cocktail design against concerning variants, *Cell Res.* 31 (2021) 1130–1133.  
409 <https://doi.org/10.1038/s41422-021-00555-0>.
- [21] H. Xu, B. Wang, T.N. Zhao, Z.T. Liang, T.B. Peng, X.H. Song, J.J. Wu, Y.C. Wang,  
411 X.D. Su, Structure-based analyses of neutralization antibodies interacting with  
412 naturally occurring SARS-CoV-2 RBD variants, *Cell Res.* 31 (2021) 1126–1129.  
413 <https://doi.org/10.1038/s41422-021-00554-1>.
- [22] Y. Cao, J. Wang, F. Jian, T. Xiao, W. Song, A. Yisimayi, W. Huang, Q. Li, P. Wang,  
415 R. An, J. Wang, Y. Wang, X. Niu, S. Yang, H. Liang, H. Sun, T. Li, Y. Yu, Q. Cui, S.  
416 Liu, X. Yang, S. Du, Z. Zhang, X. Hao, F. Shao, R. Jin, X. Wang, J. Xiao, Y. Wang,  
417 X.S. Xie, B.1.1.529 escapes the majority of SARS-CoV-2 neutralizing antibodies of  
418 diverse epitopes, *BioRxiv.* (2021) 2021.12.07.470392.  
419 <https://doi.org/10.1101/2021.12.07.470392>.
- [23] J. Lee, X. Cheng, J.M. Swails, M.S. Yeom, P.K. Eastman, J.A. Lemkul, S. Wei, J.  
421 Buckner, J.C. Jeong, Y. Qi, S. Jo, V.S. Pande, D.A. Case, C.L. Brooks, A.D.  
422 MacKerell, J.B. Klauda, W. Im, CHARMM-GUI Input Generator for NAMD,  
423 GROMACS, AMBER, OpenMM, and CHARMM/OpenMM Simulations Using the  
424 CHARMM36 Additive Force Field, *J. Chem. Theory Comput.* 12 (2016) 405–413.  
425 <https://doi.org/10.1021/acs.jctc.5b00935>.
- [24] S. Nosé, A unified formulation of the constant temperature molecular dynamics  
427 methods, *J. Chem. Phys.* 81 (1984) 511–519. <https://doi.org/10.1063/1.447334>.  
428

- 429 [25] W.G. Hoover, Canonical dynamics: Equilibrium phase-space distributions, *Phys. Rev.*  
430 *A.* 31 (1985) 1695–1697. <https://doi.org/10.1103/PhysRevA.31.1695>.
- 431 [26] M. Parrinello, A. Rahman, Polymorphic transitions in single crystals: A new molecular  
432 dynamics method, *J. Appl. Phys.* 52 (1981) 7182–7190.  
433 <https://doi.org/10.1063/1.328693>.
- 434 [27] M.J. Abraham, T. Murtola, R. Schulz, S. Páll, J.C. Smith, B. Hess, E. Lindah,  
435 Gromacs: High performance molecular simulations through multi-level parallelism  
436 from laptops to supercomputers, *SoftwareX.* 1–2 (2015) 19–25.  
437 <https://doi.org/10.1016/j.softx.2015.06.001>.
- 438 [28] T. Darden, D. York, L. Pedersen, Particle mesh Ewald: An  $N \cdot \log(N)$  method for  
439 Ewald sums in large systems, *J. Chem. Phys.* 98 (1993) 10089–10092.  
440 <https://doi.org/10.1063/1.464397>.
- 441 [29] B. Hess, H. Bekker, H.J.C. Berendsen, J.G.E.M. Fraaije, LINCS: A Linear Constraint  
442 Solver for molecular simulations, *J. Comput. Chem.* 18 (1997) 1463–1472.  
443 [https://doi.org/10.1002/\(SICI\)1096-987X\(199709\)18:12<1463::AID-JCC4>3.0.CO;2-](https://doi.org/10.1002/(SICI)1096-987X(199709)18:12<1463::AID-JCC4>3.0.CO;2-H)  
444 [H.](https://doi.org/10.1002/(SICI)1096-987X(199709)18:12<1463::AID-JCC4>3.0.CO;2-H)
- 445 [30] W. Humphrey, A. Dalke, K. Schulten, VMD: Visual molecular dynamics, *J. Mol.*  
446 *Graph.* 14 (1996) 33–38. [https://doi.org/10.1016/0263-7855\(96\)00018-5](https://doi.org/10.1016/0263-7855(96)00018-5).
- 447 [31] E. Jurrus, D. Engel, K. Star, K. Monson, J. Brandi, L.E. Felberg, D.H. Brookes, L.  
448 Wilson, J. Chen, K. Liles, M. Chun, P. Li, D.W. Gohara, T. Dolinsky, R. Konecny,  
449 D.R. Koes, J.E. Nielsen, T. Head-Gordon, W. Geng, R. Krasny, G.W. Wei, M.J. Holst,  
450 J.A. McCammon, N.A. Baker, Improvements to the APBS biomolecular solvation  
451 software suite, *Protein Sci.* 27 (2018) 112–128. <https://doi.org/10.1002/pro.3280>.
- 452 [32] Schrödinger LLC, Schrödinger Release 2021-4: Prime, (2021).
- 453 [33] M.P. Jacobson, D.L. Pincus, C.S. Rapp, T.J.F. Day, B. Honig, D.E. Shaw, R.A.  
454 Friesner, A hierarchical approach to all-atom protein loop prediction, *Proteins Struct.*  
455 *Funct. Bioinforma.* 55 (2004) 351–367. <https://doi.org/10.1002/PROT.10613>.
- 456 [34] M.P. Jacobson, R.A. Friesner, Z. Xiang, B. Honig, On the Role of the Crystal  
457 Environment in Determining Protein Side-chain Conformations, *J. Mol. Biol.* 320  
458 (2002) 597–608. [https://doi.org/10.1016/S0022-2836\(02\)00470-9](https://doi.org/10.1016/S0022-2836(02)00470-9).
- 459  
460
